# Supplementary material for: Days of Flooding Associated with Increased Risk of Influenza
Source: Hindawi journal article supplement (doi:10.1155/2022/8777594), 2022-01-01
Supplement: f1 [file 8777594.f1.pdf]

### Supplemental Table 1 ICD-9 and ICD-10 codes used to capture influenza diagnoses

| ICD-9 Influenza diagnosis codes                                                                    | Diagnosis Description                                                 |
|----------------------------------------------------------------------------------------------------|-----------------------------------------------------------------------|
| 487.0, 487.1, 487.8                                                                                | Influenza with pneumonia or respiratory manifestations                |
| 488.0, 488.01, 488.8, 488.81, 488.02, 488.82, 488.09, 488.1, 488.19, 488.89, 488.11, 488.12, 487.8 | Influenza due to identified avian, novel, or seasonal influenza virus |
| ICD-10 Influenza diagnosis codes                                                                   |                                                                       |
| J09, J09.X, J09.X1, J09.X2, J09.X3, J09.X9                                                         | Influenza due to certain identified influenza viruses                 |
| J10, J10.0, J10.00, J10.01, J10.08, J10.1, J10.2, J10.8, J.10,81, J10.82, J10.83, J10.89           | Influenza due to other identified influenza viruses                   |
| J11, J11.0, J11.00, J11.08, J11.1, J11.2, J11.8, J11.81, J11.82, J11.83, J11.89                    | Influenza due to unidentified influenza virus                         |

### Supplemental Table 2 ICD-9 and ICD-10 codes used to capture influenza-like illness

| ICD-9 Influenza-like Illness Codes                                                                                                                                                                                                    | Diagnosis Description                                                                        |
|---------------------------------------------------------------------------------------------------------------------------------------------------------------------------------------------------------------------------------------|----------------------------------------------------------------------------------------------|
| 079.99                                                                                                                                                                                                                                | Unspecified viral infection                                                                  |
| 382.9                                                                                                                                                                                                                                 | Unspecified otitis media                                                                     |
| 460, 461.9, 465.8, 465.9                                                                                                                                                                                                              | Acute nasopharyngitis, sinusitis, or upper respiratory infections, unspecified               |
| 466.0                                                                                                                                                                                                                                 | Acute bronchitis                                                                             |
| 486                                                                                                                                                                                                                                   | Pneumonia, organism unspecified                                                              |
| 488.0, 488.01, 488.8, 488.81, 488.02, 488.82, 488.09, 488.1, 488.19, 488.89, 487.0, 487.1, 488.11, 488.12, 487.8                                                                                                                      | Influenza due to identified novel, avian, or seasonal influenza virus                        |
| 490                                                                                                                                                                                                                                   | Bronchitis, not specified as acute or chronic                                                |
| 786.2, 780.6, 780.6                                                                                                                                                                                                                   | Cough, fever, other physiologic disturbance of temperature regulation, and unspecified fever |
| ICD-10 Influenza-like Illness Codes                                                                                                                                                                                                   |                                                                                              |
| B97.89                                                                                                                                                                                                                                | Other viral agents as the cause of disease classified elsewhere                              |
| H66.9, H66.90, H66.91, H66.92, H66.93                                                                                                                                                                                                 | Otitis media, unspecified                                                                    |
| J00, J01.9, J01.9, J01.90, J06.9                                                                                                                                                                                                      | Acute nasopharyngitis, acute sinusitis, acute upper respiratory infection, unspecified       |
| J09, J09.X, J09.X1, J09.X2, J09.X3, J09.X9, J10, J10.0, J10.00, J10.01, J10.08, J10.1, J10.2, J10.8, J.10,81, J10.82, J10.83, J10.89, J11, J11.0, J11.00, J11.08, J11.1, J11.2, J11.8, J11.81, J11.82, J11.83, J11.89, J12.89, J12.9, | Influenza due to identified novel, avian, or seasonal influenza virus                        |
| J18, J18.1, J18.8, J18.9                                                                                                                                                                                                              | Other or unspecified viral pneumonia<br>Pneumonia unspecified organism                       |

J20.9, J40

Acute bronchitis from unspecified organism, or bronchitis not specified as acute or chronic  
Cough or fever, unspecified

R05, R50.9

**Supplemental Table 3 ICD9 and ICD 10 Codes used to capture asthma and asthma attack diagnosis**

**Asthma Diagnosis ICD 9 and ICD 10 Codes**

---

493, 493.0, 493.00, 493.01, 493.02, 493.1, 493.10, 493.11, 493.12, 493.2, 493.20, 493.21, 493.22, 493.8, 493.81, 493.82, 493.9, 493.90, 493.91, 493.92

**Asthma Attack Diagnosis ICD 9 and ICD 10 Codes**

---

493.01, 493.02, 493.11, 493.12, 493.21, 493.22, 493.91, 493.92

**Supplemental Table 4 Table 1. ICD9, ICD10, CPT, and NDC codes used to capture influenza vaccination**

**Influenza Vaccination ICD 9 and ICD 10 codes**

---

99.52, V0481, 3E01340, and 3E02340.

**Influenza Vaccination CPT codes**

---

90686, 90688, 90672, 90682, 90685, 90687, 90662, 90656, 90658, 90653, 90674, 90661, Q2037, 90630, 90749, 90756, 90673, 90655, 90657, 90460, 90461, 90471, 90472, 90473, 90474, 90654, 90660, Q2034, Q2035, Q2036, Q2038, and Q2039.

**Influenza Vaccination NDC codes**

---

33332-0010-01, 33332-0013-01, 33332-0014-01, 33332-0015-01, 33332-0016-01, 33332-0017-01, 33332-0018-01, 33332-0110-10, 33332-0113-10, 33332-0114-10, 33332-0115-10, 33332-0116-10, 33332-0117-10, 33332-0118-10, 33332-0316-01, 33332-0317-01, 33332-0318-01, 33332-0416-10, 33332-0417-10, 33332-0418-10, 66521-0000-01, 70461-0001-01, 70461-0002-01, 70461-0018-03, 58160-0879-52, 58160-0880-52, 58160-0881-52, 58160-0883-52, 58160-0898-52, 58160-0900-52, 58160-0901-52, 58160-0903-52, 58160-0905-52, 58160-0907-52, 42874-0012-10, 42874-0013-10, 42874-0014-10, 42874-0015-10, 42874-0016-10, 42874-0017-10, 42874-0117-10, 49281-0718-10, 62577-0613-01, 62577-0614-01, 63851-0612-01, 63851-0613-01, 70461-0200-01, 70461-0301-10, 70461-0418-10, 70461-0201-01, 70461-0318-03, 19515-0845-11, 19515-0850-52, 19515-0889-07, 19515-0890-07, 19515-0893-07, 19515-0891-11, 19515-0894-52, 19515-0895-11, 19515-0896-11, 19515-0898-11, 19515-0900-11, 19515-0901-52, 19515-0903-11, 19515-0908-52, 19515-0909-52, 19515-0912-52, 66019-0107-01, 66019-0108-10, 66019-0109-10, 66019-0110-10, 66019-0300-10, 66019-0301-10, 66019-0302-10, 66019-0303-10, 66019-0304-10, 66019-0305-10, 66521-0112-02, 66521-0112-10, 66521-0113-02, 66521-0113-10, 66521-0114-02, 66521-0114-10, 66521-0115-02, 66521-0115-10, 66521-0116-02, 66521-0116-10, 66521-0117-02, 66521-0117-10, 66521-0118-02, 66521-0118-10, 70461-0119-02, 70461-0119-10, 70461-0120-02, 70461-0120-10, 49281-0010-10, 49281-0010-25, 49281-0010-50, 49281-0011-10, 49281-0011-50, 49281-0012-10, 49281-0012-50, 49281-0013-10, 49281-0013-50, 49281-0014-50, 49281-0111-25, 49281-0112-25, 49281-0113-25, 49281-0386-15, 49281-0387-65, 49281-0388-15, 49281-0390-15, 49281-0392-15, 49281-0394-15, 49281-0396-15, 49281-0705-55, 49281-0707-55, 54868-6177-00, 54868-6180-00, 49281-0389-65, 49281-0391-65,

---

49281-0393-65, 49281-0395-65, 49281-0397-65, 49281-0399-65, 49281-0401-65, 49281-0403-65, 49281-0703-55, 49281-0709-55, 49281-0708-40, 49281-0710-40, 49281-0712-40, 49281-0413-10, 49281-0413-50, 49281-0414-10, 49281-0414-50, 49281-0415-10, 49281-0416-10, 49281-0416-50, 49281-0417-10, 49281-0417-50, 49281-0418-10, 49281-0418-50, 49281-0513-25, 49281-0514-25, 49281-0516-25, 49281-0517-25, 49281-0518-25, 49281-0621-15, 49281-0625-15, 49281-0627-15, 49281-0629-15, 49281-0640-15, 49281-0650-10, 49281-0650-25, 49281-0650-50, 49281-0650-70, 49281-0650-90, 66521-0200-02, 66521-0200-10, 58160-0808-15, 58160-0808-15, 66019-0200-10, 76420-0482-01, 76420-0483-01

**Supplemental Table 5 Bivariate correlation matrix of potential covariates**

|                           | Avg Temp (Flood) | Avg Temp (Flu) | Relative Humidity (Flood) | Relative Humidity (Flu) | Absolute Humidity (Flood) | Absolute Humidity (Flu) | Flooding | Vacc Rate | Asthma Rate | Asthma Attack Rate | Pop Density | % Under 5 | % Older 75 | % Animal Production |
|---------------------------|------------------|----------------|---------------------------|-------------------------|---------------------------|-------------------------|----------|-----------|-------------|--------------------|-------------|-----------|------------|---------------------|
| Avg Temp (Flood)          | 1.00             | 0.49**         | -0.52**                   | -0.51**                 | 0.54**                    | 0.25*                   | 0.04     | -0.30**   | -0.04       | -0.05              | 0.20*       | 0.31**    | -0.33**    | -0.27**             |
| Avg Temp (Flu)            | 0.49**           | 1.00           | 0.15*                     | -0.24**                 | 0.71**                    | 0.90**                  | 0.02     | -0.29**   | -0.34**     | -0.34**            | 0.12        | 0.17*     | -0.28**    | -0.21*              |
| Relative Humidity (Flood) | -0.52**          | 0.15*          | 1.00                      | 0.38**                  | 0.42**                    | 0.32**                  | 0.02     | 0.06      | -0.16*      | -0.17*             | -0.19**     | -0.22**   | 0.05       | 0.07                |
| Relative Humidity (Flu)   | -0.51**          | -0.24**        | 0.38**                    | 1.00                    | -0.23**                   | 0.14*                   | 0.03     | 0.17*     | -0.14*      | -0.13              | -0.35**     | -0.41**   | 0.34**     | 0.30**              |
| Absolute Humidity (Flood) | 0.54**           | 0.71**         | 0.42**                    | -0.23**                 | 1.00                      | 0.59**                  | 0.05     | -0.29**   | -0.20**     | -0.21**            | 0.03        | 0.12      | -0.30**    | -0.22**             |
| Absolute Humidity (Flu)   | 0.25*            | 0.90**         | 0.32**                    | 0.14*                   | 0.59**                    | 1.00                    | 0.03     | -0.24**   | -0.43**     | -0.43**            | -0.01       | -0.01     | -0.17*     | -0.12               |
| Flooding                  | 0.04             | 0.02           | 0.02                      | 0.03                    | 0.05                      | 0.03                    | 1.00     | 0.01      | 0.05        | 0.12               | -0.17       | -0.01     | -0.14      | 0.07                |
| Vacc Rate                 | -0.30**          | -0.29**        | 0.06                      | 0.17*                   | -0.29**                   | -0.24**                 | 0.01     | 1.00      | 0.56**      | 0.47**             | 0.17*       | -0.09     | 0.03       | 0.05                |
| Asthma Rate               | -0.04            | -0.34**        | -0.16*                    | -0.14*                  | -0.20**                   | -0.43**                 | 0.05     | 0.56**    | 1.00        | 0.89**             | 0.28**      | 0.06      | -0.21**    | -0.28**             |
| Asthma Attack Rate        | -0.05            | -0.34**        | -0.17*                    | -0.13                   | -0.21**                   | -0.43**                 | 0.12     | 0.47**    | 0.89**      | 1.00               | 0.33**      | 0.04      | -0.08      | -0.25**             |
| Pop Density               | 0.20*            | 0.12           | -0.19**                   | -0.35**                 | 0.03                      | -0.01                   | -0.17    | 0.17*     | 0.28**      | 0.33**             | 1.00        | 0.59**    | -0.50**    | -0.71**             |
| % Under 5                 | 0.31**           | 0.17*          | -0.22**                   | -0.41**                 | 0.12                      | -0.01                   | -0.01    | -0.09     | 0.06        | 0.04               | 0.59**      | 1.00      | -0.53**    | -0.57**             |
| % Older 75                | -0.33**          | -0.28**        | 0.05                      | 0.34**                  | -0.30**                   | -0.17*                  | -0.14    | 0.03      | -0.21**     | -0.08              | -0.50**     | -0.53**   | 1.00       | 0.82**              |
| % Animal Production       | -0.27**          | -0.21*         | 0.07                      | 0.30**                  | -0.22**                   | -0.12                   | 0.07     | 0.05      | -0.28**     | -0.25**            | -0.71**     | -0.57**   | 0.82**     | 1.00                |

Avg: Average Temp: Temperature Vacc: Vaccination \* p < 0.05 \*\* p << 0.005

**Supplemental Table 6 Bayesian CAR model results using imputed environmental (set to 0) data and influenza diagnosis rates as the outcome**

| <b>Variable</b>                      | <b>Mean</b> | <b>2.5% Quantile</b> | <b>97.5% Quantile</b> | <b>Gelman Diag.</b> | <b>Probability of risk &gt; 1</b> |
|--------------------------------------|-------------|----------------------|-----------------------|---------------------|-----------------------------------|
| Asthma Attack Rate                   | 0.996       | 0.976                | 1.02                  | 1.00                | 0.173                             |
| Vaccination Rate                     | 1.00        | 1.00                 | 1.00                  | 1.00                | ≤0.001                            |
| Population Density                   | 1.00        | 1.00                 | 1.00                  | 1.00                | ≤0.001                            |
| Percent in Animal Production         | 1.11        | 1.02                 | 1.19                  | 1.00                | 0.989                             |
| Average Absolute Humidity            | 1.56        | 0.889                | 2.77                  | 1.00                | 0.941                             |
| Total Average Days Above Flood Stage | 1.01        | 0.999                | 1.02                  | 1.00                | 0.680                             |

**Supplemental Table 7 Bayesian CAR model results using imputed environmental (impute) data and influenza diagnosis rates as the outcome**

| <b>Variable</b>                      | <b>Mean</b> | <b>2.5% Quantile</b> | <b>97.5% Quantile</b> | <b>Gelman Diag.</b> | <b>Probability of risk &gt; 1</b> |
|--------------------------------------|-------------|----------------------|-----------------------|---------------------|-----------------------------------|
| Asthma Attack Rate                   | 0.996       | 0.976                | 1.02                  | 1.00                | 0.186                             |
| Vaccination Rate                     | 1.00        | 1.00                 | 1.00                  | 1.00                | ≤0.001                            |
| Population Density                   | 1.00        | 1.00                 | 1.00                  | 1.00                | ≤0.001                            |
| Percent in Animal Production         | 1.11        | 1.02                 | 1.20                  | 1.00                | 0.992                             |
| Average Absolute Humidity            | 1.58        | 0.903                | 2.77                  | 1.00                | 0.947                             |
| Total Average Days Above Flood Stage | 1.01        | 0.999                | 1.02                  | 1.00                | 0.740                             |

### A. Vaccination Rate

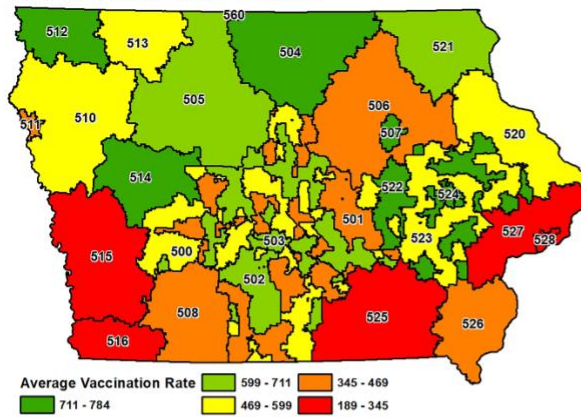

### B. Percent in Animal Production

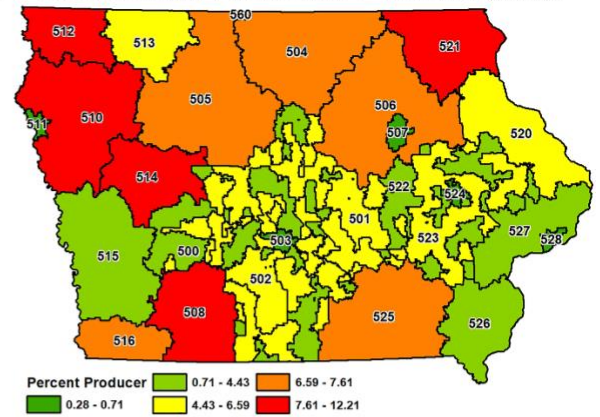

### C. Absolute Humidity

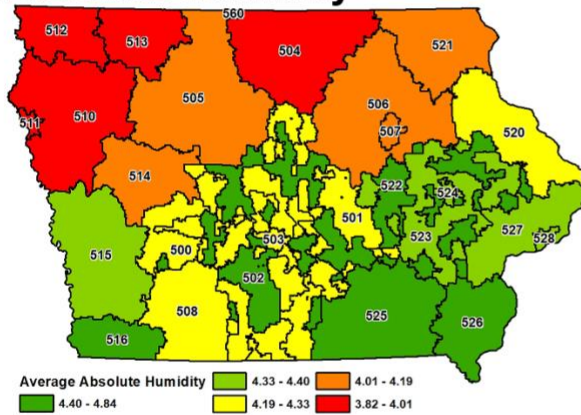

### D. Population Density

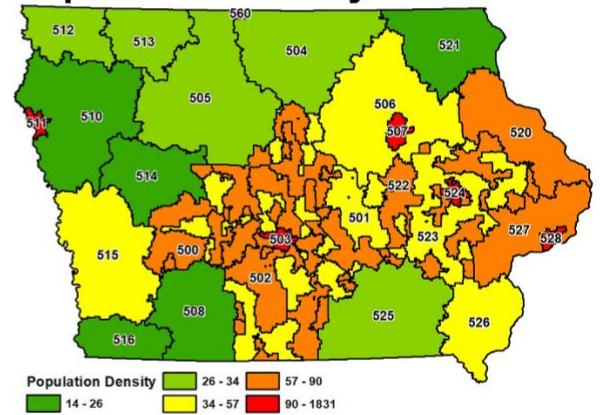

### E. Asthma Attack Rate

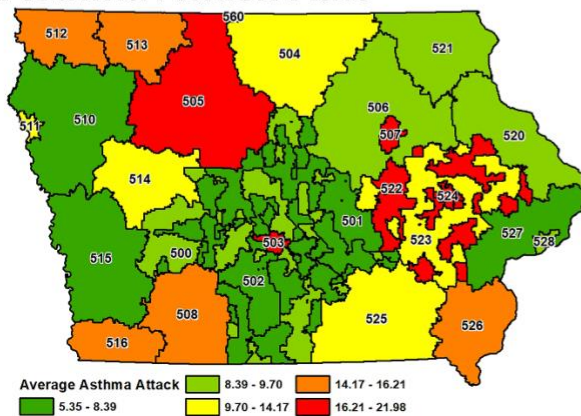

**Supplemental Figure 1 Maps of other covariates used in modeling process.** A) Vaccination Rates. Average vaccination per each three-digit ZCTA from 2007-2017. B) Percent of population working in Animal Production. Percent of each three-digit ZCTA total population that indicated Animal production as their primary vocation. C) Average Absolute Humidity. Average Absolute humidity from 2007-2017. D) Population Density. Population density for each three-digit ZCTA. E) Average Asthma Attack Rate. Average asthma attack rates per each three-digit ZCTA from 2007-2017.
